# Supplementary material
Source: MDPI journal article supplement (https://www.mdpi.com/2071-1050/16/1/315)
Supplement: s1 [file s1]

# Pretreated Agro-Industrial Effluents as a Source of Nutrients for Tomato Grow in Dual Function Hydroponic System: Tomato Quality Assessment

Alexandra Afonso <sup>1,2,\*</sup>, Carlos Ribeiro <sup>1</sup>, Maria João Carvalho <sup>1,3</sup>, Tânia Correia <sup>1</sup>, Pedro Correia <sup>1</sup>, Mariana Regato <sup>4</sup>, Idália Costa <sup>4</sup>, Annabel Fernandes <sup>2,5</sup>, Adelaide Almeida <sup>1,2</sup>, Ana Lopes <sup>2,5</sup> and Fátima Carvalho <sup>1,2</sup>

<sup>1</sup> Department of Applied Sciences and Technologies, Escola Superior Agrária de Beja, Instituto Politécnico de Beja, 7800-309 Beja, Portugal; carlos.ribeiro@ipbeja.pt (C.R.); joaobcarvalho@ipbeja.pt (M.J.C.); taires.correia@gmail.com (T.C.); pedro\_correia92@hotmail.com (P.C.); maalmeida@ipbeja.pt (A.A.); mfcarvalho@ipbeja.pt (F.C.)

<sup>2</sup> Fiber Materials and Environmental Technologies (FibEnTech-UBI), Universidade da Beira Interior, R. Marquês D'Ávila e Bolama, 6201-001 Covilhã, Portugal; annabelf@ubi.pt (A.F.); analopes@ubi.pt (A.L.)

<sup>3</sup> MARE–Marine and Environmental Sciences Centre, CETEMARES–Marine Sciences R&D, Education and Knowledge Dissemination Centre, Polytechnic Institute of Leiria, Av. Porto de Pesca, 2520-630 Peniche, Portugal

<sup>4</sup> Department of Bioscience, Escola Superior Agrária de Beja, Instituto Politécnico de Beja, 7800-295 Beja, Portugal; mare@ipbeja.pt (M.R.); idalia.costa@ipbeja.pt (I.C.)

<sup>5</sup> Department of Chemistry, Universidade da Beira Interior, R. Marquês D'Ávila e Bolama, 6201-001 Covilhã, Portugal

\* Correspondence: alexandra.afonso@ipbeja.pt

## Supplementary Material

**Table S1.** Nutritive solution supplementation throughout the development phase of the tomato plants.

| Reagent                                                | Stage of growth                       |                                                    |                                        |
|--------------------------------------------------------|---------------------------------------|----------------------------------------------------|----------------------------------------|
|                                                        | Transplant to 2 <sup>nd</sup> cluster | 2 <sup>nd</sup> cluster to 5 <sup>th</sup> cluster | 5 <sup>th</sup> cluster to termination |
| TRADECORP AZ / mg L <sup>-1</sup>                      | 23                                    | 23                                                 | 23                                     |
| KNO <sub>3</sub> / mg L <sup>-1</sup>                  | 157                                   | 235                                                | 364                                    |
| MgSO <sub>4</sub> / mg L <sup>-1</sup>                 | 456                                   | 504                                                | 504                                    |
| KH <sub>2</sub> PO <sub>4</sub> / mg L <sup>-1</sup>   | 220                                   | 220                                                | 220                                    |
| Ca(NO <sub>3</sub> ) <sub>2</sub> / mg L <sup>-1</sup> | 415                                   | 415                                                | 415                                    |

**Table S2.** Characterization of the plants and fruit grown in the different hydroponic systems fed with nutritive solution from pretreated CWW (mean value  $\pm$  standard deviation, n $\geq$ 10).

| Parameter                         |                          | Setup A                    |                            |                             | Setup B                   |                          |                             |
|-----------------------------------|--------------------------|----------------------------|----------------------------|-----------------------------|---------------------------|--------------------------|-----------------------------|
|                                   |                          | A1                         | A2                         | A3                          | B1                        | B2                       | B3                          |
| Plant                             | Height / cm              | 121 $\pm$ 19 <sup>b</sup>  | 126 $\pm$ 18 <sup>b</sup>  | 145 $\pm$ 14 <sup>a</sup>   | 102 $\pm$ 20 <sup>b</sup> | 95 $\pm$ 20 <sup>b</sup> | 151 $\pm$ 35 <sup>a</sup>   |
|                                   | Stem diameter / mm       | 11 $\pm$ 2 <sup>b</sup>    | 13 $\pm$ 2 <sup>a</sup>    | 10.0 $\pm$ 0.6 <sup>b</sup> | 10 $\pm$ 2 <sup>a</sup>   | 10 $\pm$ 1 <sup>a</sup>  | 10.5 $\pm$ 0.8 <sup>a</sup> |
|                                   | Number of leaves         | 9 $\pm$ 2 <sup>b</sup>     | 8 $\pm$ 2 <sup>b</sup>     | 16 $\pm$ 3 <sup>a</sup>     | 21 $\pm$ 3 <sup>b</sup>   | 21 $\pm$ 3 <sup>b</sup>  | 38 $\pm$ 4 <sup>a</sup>     |
|                                   | Number of bunches        | 4 $\pm$ 1 <sup>b</sup>     | 5 $\pm$ 1 <sup>b</sup>     | 6 $\pm$ 1 <sup>a</sup>      | 5 $\pm$ 2 <sup>b</sup>    | 5 $\pm$ 1 <sup>b</sup>   | 14 $\pm$ 8 <sup>a</sup>     |
|                                   | Total fruit              | 26 $\pm$ 13 <sup>a,b</sup> | 34 $\pm$ 11 <sup>a</sup>   | 15 $\pm$ 9 <sup>b</sup>     | 12 $\pm$ 7 <sup>b</sup>   | 13 $\pm$ 6 <sup>b</sup>  | 128 $\pm$ 69 <sup>a</sup>   |
|                                   | Marketable fruit         | 19 $\pm$ 10 <sup>a</sup>   | 23 $\pm$ 9 <sup>a</sup>    | 5 $\pm$ 4 <sup>b</sup>      | 6 $\pm$ 3 <sup>b</sup>    | 8 $\pm$ 4 <sup>b</sup>   | 74 $\pm$ 56 <sup>a</sup>    |
| Fruit                             | Diameter / mm            | 25 $\pm$ 3 <sup>a</sup>    | 27 $\pm$ 2 <sup>a</sup>    | 26 $\pm$ 2 <sup>a</sup>     | 16 $\pm$ 2 <sup>a</sup>   | 18 $\pm$ 3 <sup>a</sup>  | 18 $\pm$ 1 <sup>a</sup>     |
|                                   | Marketable diameter / mm | 27 $\pm$ 4 <sup>a</sup>    | 28 $\pm$ 2 <sup>a</sup>    | 27 $\pm$ 3 <sup>a</sup>     | 21 $\pm$ 4 <sup>a</sup>   | 22 $\pm$ 2 <sup>a</sup>  | 19 $\pm$ 1 <sup>a</sup>     |
|                                   | Weight / g               | 11 $\pm$ 3 <sup>a</sup>    | 13 $\pm$ 3 <sup>a</sup>    | 11 $\pm$ 2 <sup>a</sup>     | 4 $\pm$ 2 <sup>a</sup>    | 5 $\pm$ 1 <sup>a</sup>   | 4.1 $\pm$ 0.4 <sup>a</sup>  |
|                                   | Marketable weight / g    | 12 $\pm$ 4 <sup>a</sup>    | 14 $\pm$ 3 <sup>a</sup>    | 12 $\pm$ 3 <sup>a</sup>     | 7 $\pm$ 3 <sup>a</sup>    | 6 $\pm$ 2 <sup>a</sup>   | 4 $\pm$ 1 <sup>a</sup>      |
| Total marketable weight (g)/plant |                          | 228 $\pm$ 163 <sup>b</sup> | 337 $\pm$ 141 <sup>a</sup> | 62 $\pm$ 51 <sup>c</sup>    | 37 $\pm$ 24 <sup>b</sup>  | 62 $\pm$ 38 <sup>b</sup> | 315 $\pm$ 221 <sup>a</sup>  |

a,b,c Different letters in different lines means statistically significant differences (P<0.05).

**Table S3.** Sensory characteristics of the cherry tomatoes (*Solanum lycopersicum* var. *cerasiforme*) produced in the different hydroponic systems, evaluated in two different sessions. 5=extremely pleasant; 4=pleasant; 3=indifferent; 2=unpleasant; 1=extremely unpleasant (mean value  $\pm$  standard deviation, n $\geq$ 30).

| Parameter            | Session 1             |                       | Session 2                |                          |                          |                        |
|----------------------|-----------------------|-----------------------|--------------------------|--------------------------|--------------------------|------------------------|
|                      | A1                    | A2                    | A3                       | B1                       | B2                       | B3                     |
| Red color            | 3.7±0.8 <sup>b</sup>  | 4.3± 0.8 <sup>a</sup> | 4.5 ± 0.7 <sup>a</sup>   | 4.0 ± 0.8 <sup>a,c</sup> | 3.9 ± 0.8 <sup>b,c</sup> | 3.8±0.9 <sup>c</sup>   |
| Smell                | 3.7± 0.8 <sup>b</sup> | 4.1± 0.8 <sup>a</sup> | 4.1 ± 0.7 <sup>a</sup>   | 4.2 ± 0.5 <sup>a</sup>   | 3.8 ± 0.8 <sup>a</sup>   | 3.5±0.9 <sup>b,c</sup> |
| Flavor               | 4.0± 0.7 <sup>b</sup> | 4.5± 0.8 <sup>a</sup> | 3.2 ± 0.9 <sup>b,c</sup> | 4.2 ± 0.9 <sup>a</sup>   | 4.0 ± 0.8 <sup>a</sup>   | 3.3±0.9 <sup>b,c</sup> |
| Juiciness            | 3.9± 0.8 <sup>a</sup> | 4.1± 0.8 <sup>a</sup> | 3.7 ± 0.8 <sup>a</sup>   | 3.9 ± 0.9 <sup>a</sup>   | 4.1 ± 0.7 <sup>a</sup>   | 3.6±0.9 <sup>a</sup>   |
| Texture              | 4.1±0.5 <sup>a</sup>  | 4.1± 0.9 <sup>a</sup> | 3.4 ± 0.9 <sup>b,c</sup> | 3.9 ± 0.8 <sup>a,c</sup> | 4.0 ± 0.7 <sup>a</sup>   | 3.5±0.9 <sup>a</sup>   |
| Overall appreciation | 4.3± 0.7 <sup>a</sup> | 4.2±0.8 <sup>a</sup>  | 3.8 ± 0.8 <sup>a</sup>   | 4.0 ± 0.6 <sup>a</sup>   | 3.9 ± 0.7 <sup>a,c</sup> | 3.4±0.9 <sup>b,c</sup> |

a,b,c Different letters in different lines means statistically significant differences (P<0.05).
